# Supplementary material
Source: publisher figshare collection journal article supplement (https://frontiersin.figshare.com/ndownloader/files/12551495)

Supplementary file

Game scores

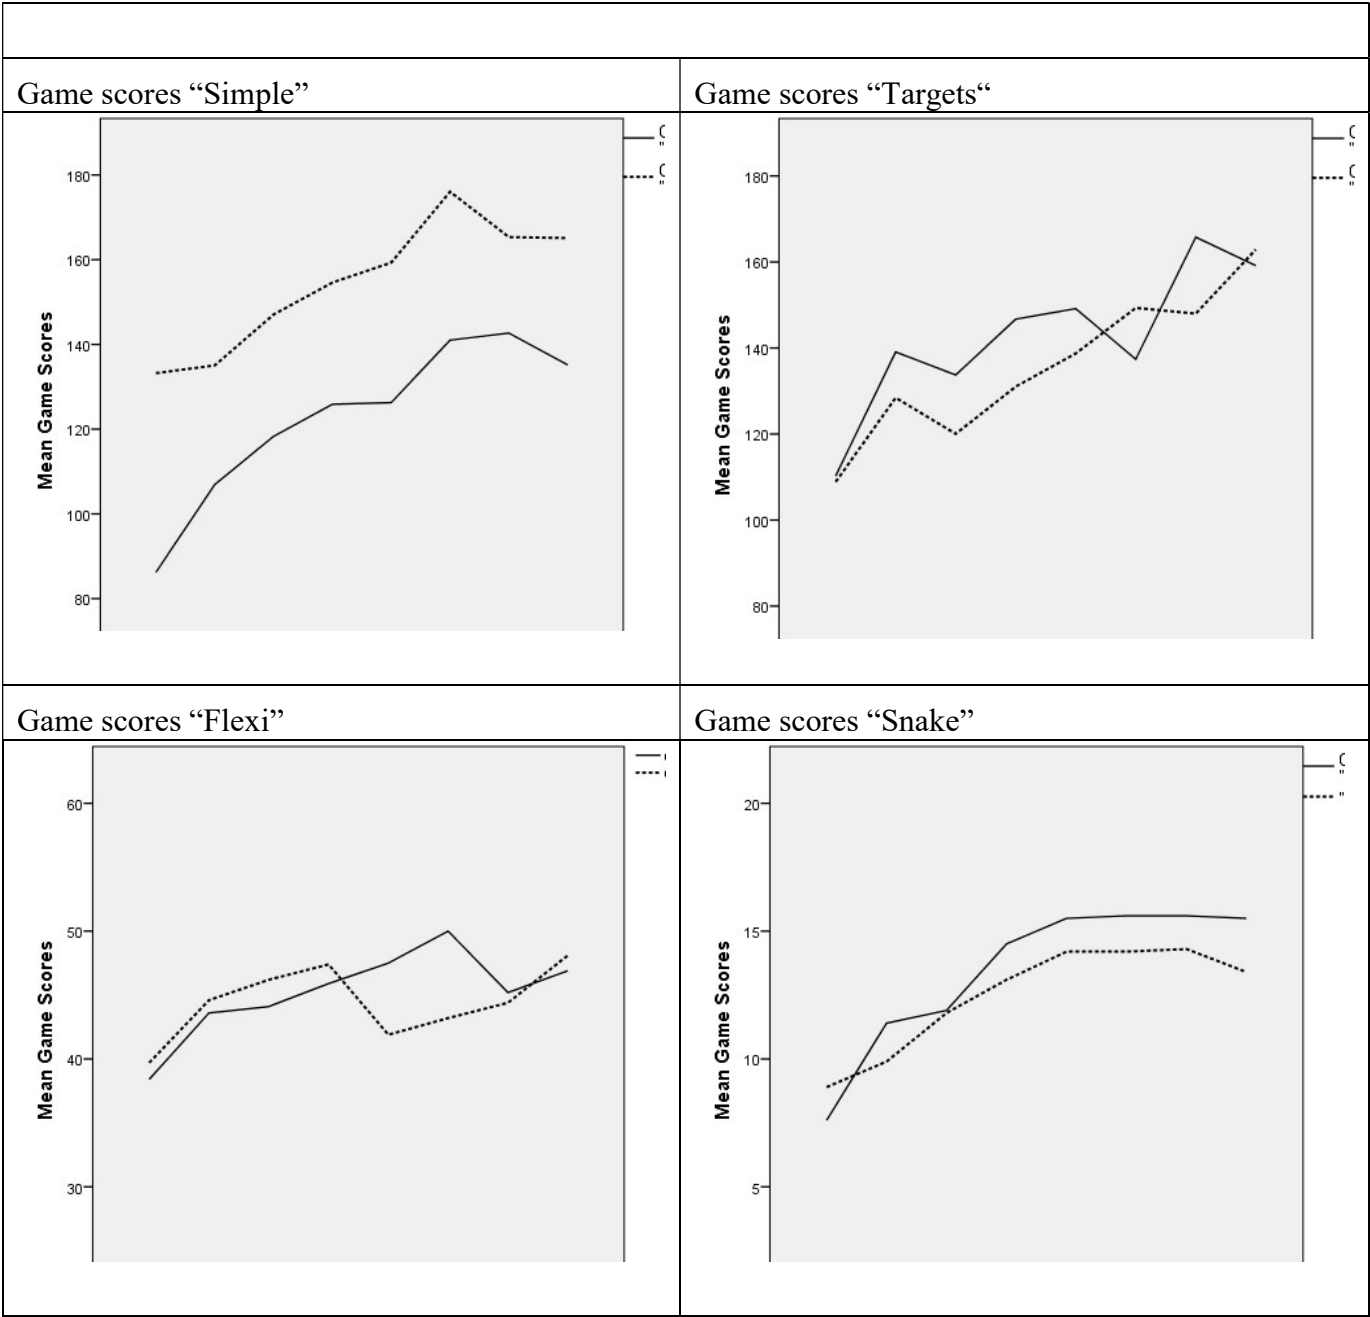

Targets (Hits and Misses)

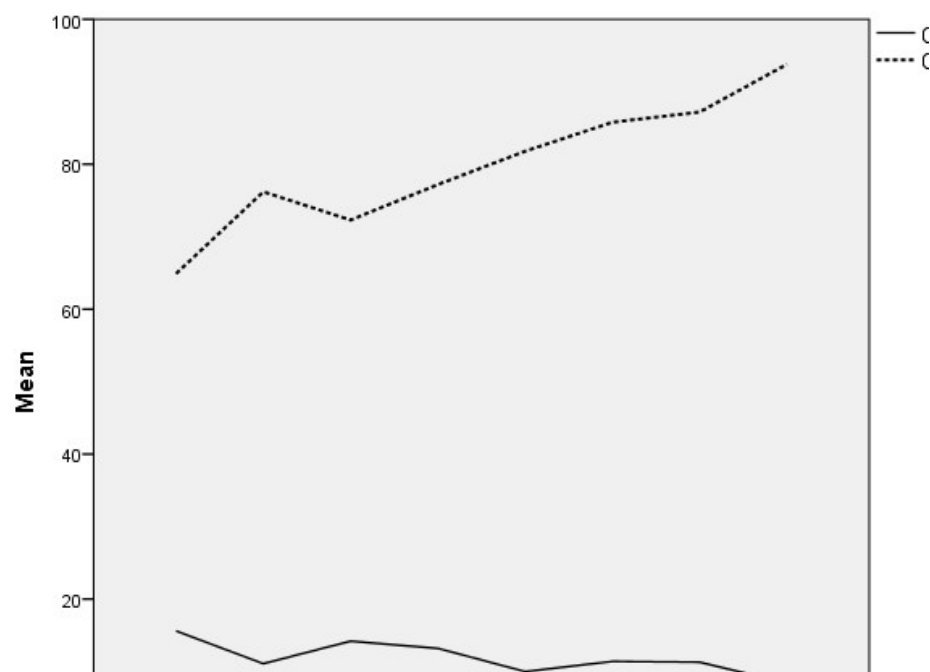

Supplement: Supplementary file [file 12551495]
